# Supplementary material
Source: ML conference proceedings conference paper supplement (https://proceedings.mlr.press/v130/jang21a.html)
Supplement: Supplementary file 1 [file jang21a-supp.pdf]

---

## Improving Classifier Confidence using Lossy Label-Invariant Transformations: Supplementary Material

---

### A Brier score

Brier score (Brier, 1950) is defined as Equation 5.

$$Brier = \frac{1}{N} \sum_{i=1}^N \sum_{k=1}^K (p_{ik} - y_{ik})^2 \quad (5)$$

where,  $N$  is the dataset size,  $K$  is the number of classes,  $p_{ik}$  is the confidence for the label  $k$  of the  $i^{th}$  data, and  $y_{ik}$  is 1 if the true label for  $i^{th}$  data is  $k$  otherwise 0. Here, we normalized Brier score by dividing it by the number of classes as used in Kull et al. (2019). The formal definition of the normalized Brier score is shown in Equation 6.

$$Normalized\ Brier = \frac{1}{NK} \sum_{i=1}^N \sum_{k=1}^K (p_{ik} - y_{ik})^2 \quad (6)$$

### B Flowchart for Runtime Confidence Calculation using ReCal

After ReCal learns a calibration map, it can process runtime calibration as illustrated in Figure 4. It consists of two steps: initialization step, iterative group-wise calibration. In initialization step, it computes the base logits for original inputs and transformed inputs by the sampled transformation during the learning process. After the initialization step, it repeats 1) Find a group number for the given input, 2) Calibrate logits using given temperature parameter. The detail explanation about this process is in Section 5.

### C Datasets and Models

This section describes the datasets and models for our experiments. In detail, it describes the details about the datasets, *e.g.*, the dataset size, and the number of classes. It also explains the list of models for each dataset and how we obtain the models.

**Datasets.** We perform experiments on three datasets: CIFAR10/100 (Krizhevsky et al., 2009), ImageNet (Deng et al., 2009). CIFAR10/100 contain 10/100 classes images whose dimension is a  $32 \times 32 \times 3$ . Its original dataset size is 50,000/10,000 for training/test, and 5,000 images are sampled from the training set as a validation set. ImageNet has 1,000 classes images of  $224 \times 224 \times 3$ . The original dataset size is 1.3M/50,000 for training/validation, and 25,000 images are sampled from the validation set as a test set.

**Models.** We investigate various models for each dataset. For CIFAR10/100, we use DenseNet40 (Huang et al., 2017), LeNet5 (LeCun et al., 1998), ResNet10 (He et al., 2016), ResNet110 SD (Huang et al., 2016), and WRN-28-10 (Zagoruyko and Komodakis, 2016). We acquire codes for DenseNet40 from a github repository (Veit et al., 2017), ResNet110 and WRN-28-10 from a github repository (Yang et al., 2019), and implement other models. For ImageNet, we use DenseNet161 (Huang et al., 2017) and ResNet152 (He et al., 2016), obtained from PyTorch.

### D Additional Results

In this section, we display more results for Section 4 and Section 6. For Section 4, we present the detail ECE and number of images of each group for each transformation type and parameter, and for Section 6, we show the test error rate and learning time of a calibration map.

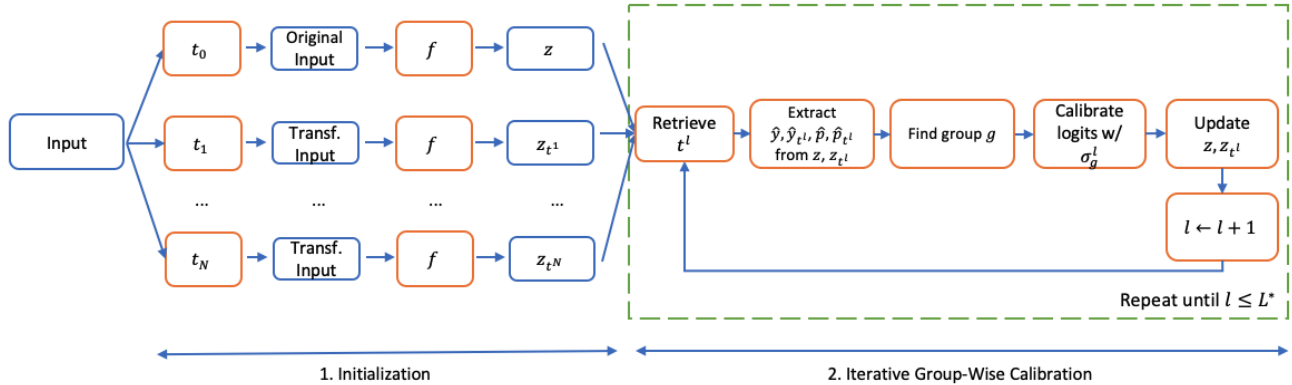

Figure 4: Runtime Confidence Calculation using ReCal

### D.1 Detail Result for Lossy Label-Invariant Grouping

Table 4 and 5 show ECE and number of images of each group for different parameters using zoom-out transformation and brightness transformation. The second row represents ECE and number of images of test data, and following rows show the ECE and the number of images of each group for each transformation parameter. The bold and italic numbers mean the best and worst result among four groups, respectively.

As shown in Table 4, with zoom-out transformation, group 4 has the best ECE, *i.e.*, this group requires less adjustment and group 1 has the worst ECE *i.e.*, this group requires more adjustment, and group 2 and 3 have the medium range of ECE, for the most of transformation parameters except 0.1x and 0.2x. The similar pattern with more variability is observed with brightness transformation as displayed in Table 5. With brightness transformation, group 4 has the best ECE for the transformation less than 0.8x, and group 1 has the worst ECE for the transformation less than 0.5x. Unlike zoom-out transformation, group 2 also have the worst ECE for about the half of transformation parameters. However, each group still show different ECE compared to other groups, which supports our idea of group-wise calibration.

Table 4 and 5 show the number of images in each group. For different parameters, the image distribution over groups are different, and zoom-out transformation shows more variability than brightness transformation. Based on this observation, we design an ReCal which can incorporate multiple parameters as described in Section 5. Lastly, for zoom-out transformation with the scale factor of 0.1x, group 3 has only three images. With this small amount of images, calibration can overfit the data, and we address this issue as described in Section 5.

### D.2 Additional Comparison Results

Besides ECE and Brier Score, we also compare test error rate and learning time of a calibration map. Table 6 and 7 show the test error rate, and the learning time, respectively. For tables, bold numbers mean the best results and underlined numbers represent the second-best results.

**Error rate.** We calculate test error rate to compare the accuracy preserving properties. As shown in Table 6, temperature scaling (TS), ReCal do not change the original accuracy, *i.e.*, their error rate is equal to an uncalibrated classifier’s one. However, vector scaling (VS), MS-ODIR, and Dir-ODIR change the original accuracy. Without a consistent pattern, all of those calibration algorithms increase or decrease the error rate depending on the dataset and model. In detail, vector scaling decreases the original classifier’s accuracy except the ImageNet experiments. MS-ODIR hurts the original classifier’s accuracy except for DenseNet40 and ResNet110 SD on CIFAR10 and DenseNet161, ResNet152 on ImageNet. Dir-ODIR worsen the original classifier’s accuracy except for LeNet5 on CIFAR10, LeNet5/Resnet110/ResNet110 SD on CIFAR100.

**Learning Time.** We display the learning time of a calibration map for each algorithm in Table 7. Temperature scaling (TS) is always the fastest calibration algorithm followed by vector scaling (VS). The next fastest one is ReCal, and we think ReCal can be applied to ImageNet in terms of the learning time. Specifically, it takes 50,730 seconds or 14.1 hours for DenseNet161 on ImageNet and 71,254 seconds or 19.8 hours for ResNet152 on ImageNet. On the other hand, MS-ODIR and Dir-ODIR are slower than other calibration algorithms because it basically calibrate many models to find appropriate its hyper-parameters.

Table 4: Grouping Image Using Zoom-Out Transformation

|       | Test Data | ECE             |                 | Count |           |
|-------|-----------|-----------------|-----------------|-------|-----------|
|       |           | 0.020069        |                 | 25000 |           |
|       |           | Incr.           | Not Incr.       | Incr. | Not Incr. |
| 0.9x  | Change    | <i>0.047142</i> | 0.040512        | 1578  | 2328      |
|       | No Change | 0.025389        | <b>0.020825</b> | 8250  | 12844     |
| 0.8x  | Change    | <i>0.048417</i> | 0.033766        | 1830  | 3084      |
|       | No Change | 0.025770        | <b>0.020072</b> | 7038  | 13048     |
| 0.7x  | Change    | <i>0.036925</i> | 0.034266        | 1938  | 4149      |
|       | No Change | 0.029248        | <b>0.019347</b> | 6109  | 12804     |
| 0.67x | Change    | <i>0.040322</i> | 0.032636        | 1990  | 4690      |
|       | No Change | 0.028604        | <b>0.018290</b> | 5507  | 12813     |
| 0.5x  | Change    | <i>0.044078</i> | 0.026399        | 2272  | 8444      |
|       | No Change | 0.028710        | <b>0.016006</b> | 3744  | 10540     |
| 0.4x  | Change    | <i>0.044421</i> | 0.022210        | 2041  | 12630     |
|       | No Change | 0.034228        | <b>0.016316</b> | 2096  | 8233      |
| 0.33x | Change    | <i>0.054198</i> | 0.019901        | 1837  | 16635     |
|       | No Change | 0.038278        | <b>0.017077</b> | 1067  | 5461      |
| 0.2x  | Change    | 0.073773        | <b>0.019371</b> | 791   | 23446     |
|       | No Change | <i>0.205023</i> | 0.030856        | 58    | 705       |
| 0.1x  | Change    | 0.069130        | <b>0.019659</b> | 344   | 24596     |
|       | No Change | <i>0.161533</i> | 0.098585        | 3     | 57        |

Table 5: Grouping Image Using Brightness

|       | Test Data | ECE             |                 | Count |           |
|-------|-----------|-----------------|-----------------|-------|-----------|
|       |           | 0.020069        |                 | 25000 |           |
|       |           | Incr.           | Not Incr.       | Incr. | Not Incr. |
| 0.9x  | Change    | 0.066956        | <i>0.077188</i> | 315   | 356       |
|       | No Change | <b>0.021815</b> | 0.022545        | 11404 | 12925     |
| 0.8x  | Change    | 0.059497        | <i>0.073143</i> | 556   | 625       |
|       | No Change | <b>0.023280</b> | 0.023908        | 11020 | 12799     |
| 0.7x  | Change    | 0.041225        | <i>0.052961</i> | 750   | 951       |
|       | No Change | 0.025298        | <b>0.022240</b> | 10623 | 12676     |
| 0.67x | Change    | 0.039053        | <i>0.061532</i> | 817   | 1060      |
|       | No Change | 0.024897        | <b>0.022962</b> | 10437 | 12686     |
| 0.5x  | Change    | 0.046058        | <i>0.053280</i> | 1172  | 1583      |
|       | No Change | 0.026930        | <b>0.022807</b> | 9355  | 12890     |
| 0.4x  | Change    | <i>0.045266</i> | 0.040179        | 1332  | 2109      |
|       | No Change | 0.027172        | <b>0.022091</b> | 8462  | 13097     |
| 0.33x | Change    | <i>0.048402</i> | 0.042858        | 1446  | 2572      |
|       | No Change | 0.025383        | <b>0.023382</b> | 7676  | 13306     |
| 0.2x  | Change    | <i>0.052800</i> | 0.035715        | 1578  | 4337      |
|       | No Change | 0.027635        | <b>0.017540</b> | 5394  | 13691     |
| 0.1x  | Change    | <i>0.040800</i> | 0.029543        | 1198  | 9341      |
|       | No Change | 0.034183        | <b>0.016133</b> | 2360  | 12101     |

Table 6: Test Error Rate (%)

| Dataset  | Model        | Uncal.       | TS           | VS           | MS-ODIR      | Dir-ODIR     | ReCal<br>(z, .1-.9, 20) | ReCal<br>(z, .5-.9, 10) | ReCal<br>(b, .1-.9, 20) |
|----------|--------------|--------------|--------------|--------------|--------------|--------------|-------------------------|-------------------------|-------------------------|
| CIFAR10  | DenseNet40   | <u>8.25</u>  | <u>8.25</u>  | 8.31         | <b>8.22</b>  | 8.31         | <u>8.25</u>             | <u>8.25</u>             | <u>8.25</u>             |
| CIFAR10  | LeNet5       | <u>27.23</u> | <u>27.23</u> | 27.33        | 27.24        | <b>27.20</b> | <u>27.23</u>            | <u>27.23</u>            | <u>27.23</u>            |
| CIFAR10  | ResNet110    | <b>6.90</b>  | <b>6.90</b>  | 7.06         | 7.06         | <u>7.03</u>  | <b>6.90</b>             | <b>6.90</b>             | <b>6.90</b>             |
| CIFAR10  | ResNet110 SD | <u>9.62</u>  | <u>9.62</u>  | 9.76         | <b>9.59</b>  | 9.64         | <u>9.62</u>             | <u>9.62</u>             | <u>9.62</u>             |
| CIFAR10  | WRN 28-10    | <b>4.06</b>  | <b>4.06</b>  | <u>4.10</u>  | 4.13         | <u>4.10</u>  | <b>4.06</b>             | <b>4.06</b>             | <b>4.06</b>             |
| CIFAR100 | DenseNet40   | <b>31.84</b> | <b>31.84</b> | 32.27        | 32.00        | <u>31.89</u> | <b>31.84</b>            | <b>31.84</b>            | <b>31.84</b>            |
| CIFAR100 | LeNet5       | <u>62.34</u> | <u>62.34</u> | 62.66        | 62.58        | <b>62.22</b> | <u>62.34</u>            | <u>62.34</u>            | <u>62.34</u>            |
| CIFAR100 | ResNet110    | <u>30.48</u> | <u>30.48</u> | 30.94        | 30.80        | <b>30.46</b> | <u>30.48</u>            | <u>30.48</u>            | <u>30.48</u>            |
| CIFAR100 | ResNet110 SD | <u>29.90</u> | <u>29.90</u> | 29.98        | 29.91        | <b>29.89</b> | <u>29.90</u>            | <u>29.90</u>            | <u>29.90</u>            |
| CIFAR100 | WRN 28-10    | <b>20.10</b> | <b>20.10</b> | <u>20.29</u> | 20.47        | 20.51        | <b>20.10</b>            | <b>20.10</b>            | <b>20.10</b>            |
| ImageNet | DenseNet161  | 22.55        | 22.55        | <u>22.49</u> | <b>22.10</b> | 23.07        | 22.55                   | 22.55                   | 22.55                   |
| ImageNet | ResNet152    | 21.31        | 21.31        | <u>21.22</u> | <b>20.96</b> | 21.63        | 21.31                   | 21.31                   | 21.31                   |

Table 7: Learning Time (sec)

| Dataset  | Model        | TS            | VS            | MS-ODIR   | Dir-ODIR  | ReCal<br>(z, .1-.9, 20) |
|----------|--------------|---------------|---------------|-----------|-----------|-------------------------|
| CIFAR10  | DenseNet40   | <b>2.94</b>   | <u>31.10</u>  | 77353.63  | 43001.99  | 84.04                   |
| CIFAR10  | LeNet5       | <b>1.86</b>   | <u>12.06</u>  | 42830.58  | 37001.63  | 110.79                  |
| CIFAR10  | ResNet110    | <b>2.21</b>   | <u>26.65</u>  | 70702.87  | 45836.87  | 38.85                   |
| CIFAR10  | ResNet110 SD | <b>4.35</b>   | <u>26.52</u>  | 85859.16  | 54783.42  | 58.74                   |
| CIFAR10  | WRN 28-10    | <b>7.68</b>   | <u>28.22</u>  | 67955.20  | 36386.26  | 49.62                   |
| CIFAR100 | DenseNet40   | <b>14.03</b>  | <u>26.31</u>  | 320284.77 | 134317.54 | 136.23                  |
| CIFAR100 | LeNet5       | <b>9.63</b>   | <u>26.10</u>  | 109645.75 | 83324.48  | 97.77                   |
| CIFAR100 | ResNet110    | <b>8.63</b>   | <u>26.61</u>  | 300360.19 | 134317.54 | 97.29                   |
| CIFAR100 | ResNet110 SD | <b>13.24</b>  | <u>26.73</u>  | 276767.31 | 126100.97 | 604.12                  |
| CIFAR100 | WRN 28-10    | <b>14.23</b>  | <u>25.60</u>  | 161327.35 | 85532.50  | 125.84                  |
| ImageNet | DenseNet161  | <b>865.40</b> | <u>285.73</u> | 379487.45 | 276553.98 | 50730.17                |
| ImageNet | ResNet152    | <b>754.51</b> | <u>342.50</u> | 215746.16 | 229493.41 | 71254.34                |
